# Supplementary material for: Using a Mobile-Based Online Platform to Mentor Girls: Challenges and Benefits
Source: Preprints.org preprint supplement (doi:10.20944/preprints202102.0257.v1), 2021-02-10
Supplement: Supplementary file 1 [file supplementary]

**Using a Mobile-based Online Platform to Mentor Girls: Challenges and Benefits**

Bukola Fakayode1* & Samantha Okegbe2

1 Department of Science and Technology Education, University of Ibadan, Nigeria.

2 Department of Communication, The University of Illinois Urbana-Champaign, Illinois.

Author email: [sokegbe2@illinois.edu](mailto:sokegbe2@illinois.edu)

Author full postal address: 6805 Townbrook Dr. Apt D, Gwynn Oak, Maryland, 21207.
